# Supplementary material for: N-Doped porous carbons obtained from chitosan and spent coffee as electrocatalysts with tuneable oxygen reduction reaction selectivity for H2O2 generation
Source: RSC Adv. 2023 Jul 27;13(33):22777–88. doi: 10.1039/d3ra02587j (PMC10372475; doi:10.1039/d3ra02587j)
Supplement: RA-013-D3RA02587J-s001 [file RA-013-D3RA02587J-s001.pdf]

**N-doped porous carbons obtained from chitosan and spent coffee as  
electrocatalysts with tuneable oxygen reduction reaction selectivity for H<sub>2</sub>O<sub>2</sub>  
generation**

**Supporting Information**

Alexandra S. M. Wittmar<sup>a,b,\*</sup>, Thaarmikaa Vigneswaran<sup>a</sup>, Nikola Ranković<sup>c,d</sup>, Ulrich Hagemann<sup>b,e</sup>,  
Nils Hartmann,<sup>b,e</sup> Ricardo Martínez-Hincapié<sup>b,c</sup>, Viktor Čolić<sup>b,c,\*</sup> and Mathias Ulbricht<sup>a,b</sup>

<sup>a</sup>*Lehrstuhl für Technische Chemie II, Universität Duisburg-Essen,  
Universitätsstr. 7, 45141 Essen, Germany.*

<sup>b</sup>*NETZ – NanoEnergieTechnikZentrum, CENIDE – Center for Nanointegration Duisburg-Essen, Carl-Benz-  
Str. 199, 47057 Duisburg, Germany.*

<sup>c</sup>*Electrochemistry for Energy Conversion, Max-Planck Institute for Chemical Energy Conversion, Stiftstr.  
34-36, 45470 Mülheim an der Ruhr, Germany*

<sup>d</sup>*Fakultät für Chemie und Biochemie, Ruhr-Universität Bochum,  
Universitätsstraße 150, 44801 Bochum*

*\*Corresponding authors*

**Determination of the electrochemically active surface area (ECSA):** A procedure was followed in accordance with [1]. In short, cyclic voltammetry curves (CV) were recorded in a non-Faradaic potential window in an argon saturated 0.1M HClO<sub>4</sub> solution. The CVs were recorded at five different scan rates (Figure SI1). After with the anodic current at the middle of the potential window was plotted against the scan rate (Figure SI2). A linear fit of these data gives the capacitance of the double layer ( $C_{dl}$ ). This value was divided by the specific capacitance of carbon basal plane ( $C_s=20 \mu\text{F cm}^{-2}$ ), a value commonly used in literature to get the ECSA [2].

**Gas Diffusion Electrode preparation:** A catalyst ink solution (2 mg/mL) of the carbon materials was prepared in the exact same way as described in the methods section of the paper. A Gas Diffusion Layer (GDL) was used as the substrate electrode (Freudenberg H15, Quintech). The GDL was cut into a circle with a diameter of 22 mm and a geometrical surface area of 3.8 cm<sup>2</sup>. The GDL was dried over night at 110 °C, before the catalyst ink was deposited on the surface of the GDL to make the Gas Diffusion Electrode (GDE). 190  $\mu\text{L}$  of the catalyst ink solution (2 mg/mL) was deposited using a micro pipette in five increments of 38  $\mu\text{L}$  to achieve a catalyst loading of 0.1 mg/ cm<sup>2</sup>  $\pm$  0.02 mg/cm<sup>2</sup>. After each increment of catalyst ink was deposited the GDL was dried in the oven at 110 °C for 2 minutes, after the last increment was deposited the now made GDE was kept in the desiccator before use.

**H-Cell:** Bulk electrolysis experiment were conducted in a home-made H-cell, a picture and a scheme of the setup is shown in Fig. SI6. Nafion 117 membrane (20 mm diameter) was used as the separator. Before use the membrane was activated by first boiling in 5% H<sub>2</sub>O<sub>2</sub> for one hour, then boiling in 0.5 M H<sub>2</sub>SO<sub>4</sub> for one hour and finally boiling in MQ-water. After activation the membrane was kept in ultrapure water until use and never left to dry out. Both cathodic and anodic compartments were charged with 100 mL of 0.1 M HClO<sub>4</sub>.

**H<sub>2</sub>O<sub>2</sub> quantification:** The H<sub>2</sub>O<sub>2</sub> quantification was done with permanganometry. To prepare and standardize the 0.1 N (0.02 M) solution of KMnO<sub>4</sub> the following procedure was used. 3.2-3.25 g of KMnO<sub>4</sub> was weighed out and transferred into a beaker, 1 L of ultrapure water was added to dissolve the solid. The solution was then boiled for 30 minutes and left to cool to room temperature thereafter. Afterwards, the solution was filtered through a sintered glass funnel. The filtrate was collected in a clean vessel and stored away from direct sunlight.

The solution was then standardized with sodium oxalate (Na<sub>2</sub>C<sub>2</sub>O<sub>4</sub>) as follows. 0.3 g of dried sodium oxalate was weighed into an Erlenmeyer flask, 200 mL of ultrapure water was added along with 50 mL of sulfuric acid and ultrapure water solution (1:3). The flask was heated to boiling on a hot plate, after which the solution was titrated with KMnO<sub>4</sub> from a 50-mL Class-A burette (VWR Chemicals) until the appearance of a faint pink colour that persisted for 30 seconds [3]. The concentration was calculated from equation SI1.

$$C(KMnO_4) = \frac{2 \times m(Na_2C_2O_4)}{5 \times M(Na_2C_2O_4) \times V(KMnO_4)} \quad (SI1)$$

The solution of  $KMnO_4$  used in this work had a normality of 0.095 N (0.019 M). The solution was periodically re-standardized and no deviations in concentration was observed.

To determine the concentration of  $H_2O_2$  an aliquot of 5 mL was pipetted from the cathodic compartment of the H-cell into a glass vial with a Teflon stirring rod and 1 mL of 0.5 N  $H_2SO_4$  was added. The 0.095 N solution of  $KMnO_4$  was added with a micro pipette in 10  $\mu$ L increments with constant stirring until the appearance of a faint pink colour that persisted. The amount of mols of  $H_2O_2$  was calculated using equation SI2.

$$n(H_2O_2) = \frac{5}{2} \times C(MnO_4^-) \times V(MnO_4^-) \quad (SI2)$$

Comment [MOU]: Please check

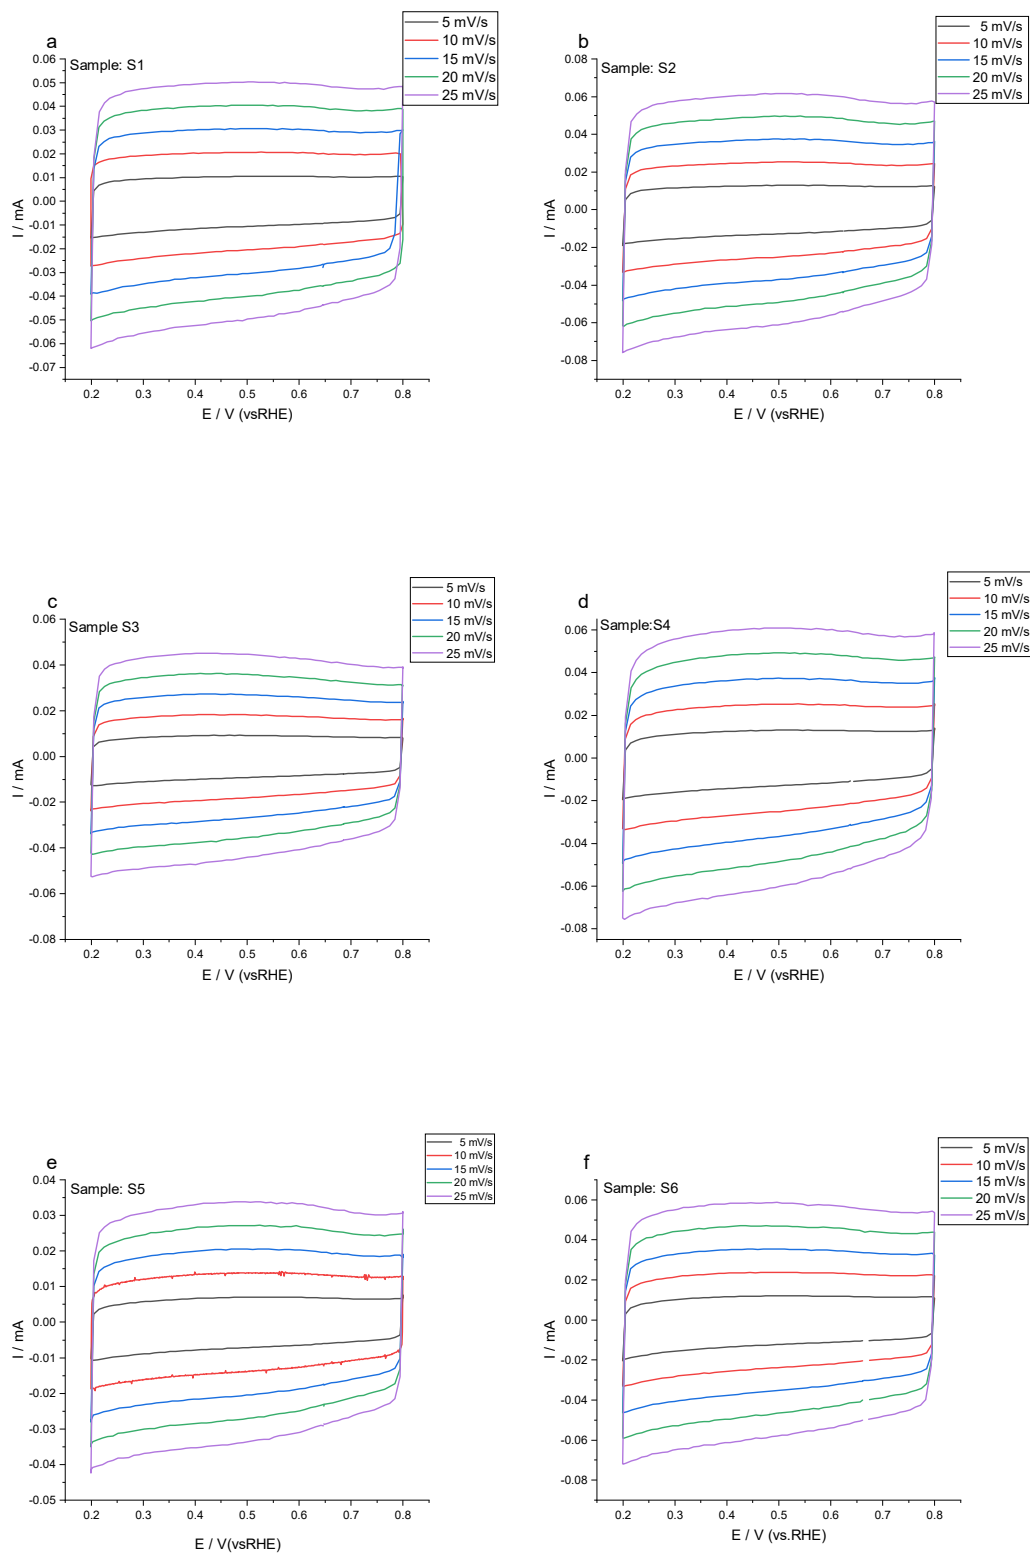

**Figure S11.** Cyclic voltammogram curves of samples S1 to S6 in the double layer region at scan rates of 5, 10, 15, 25  $\text{mV s}^{-1}$  in 0.1 M  $\text{HClO}_4$  aqueous electrolyte, under Ar saturation.

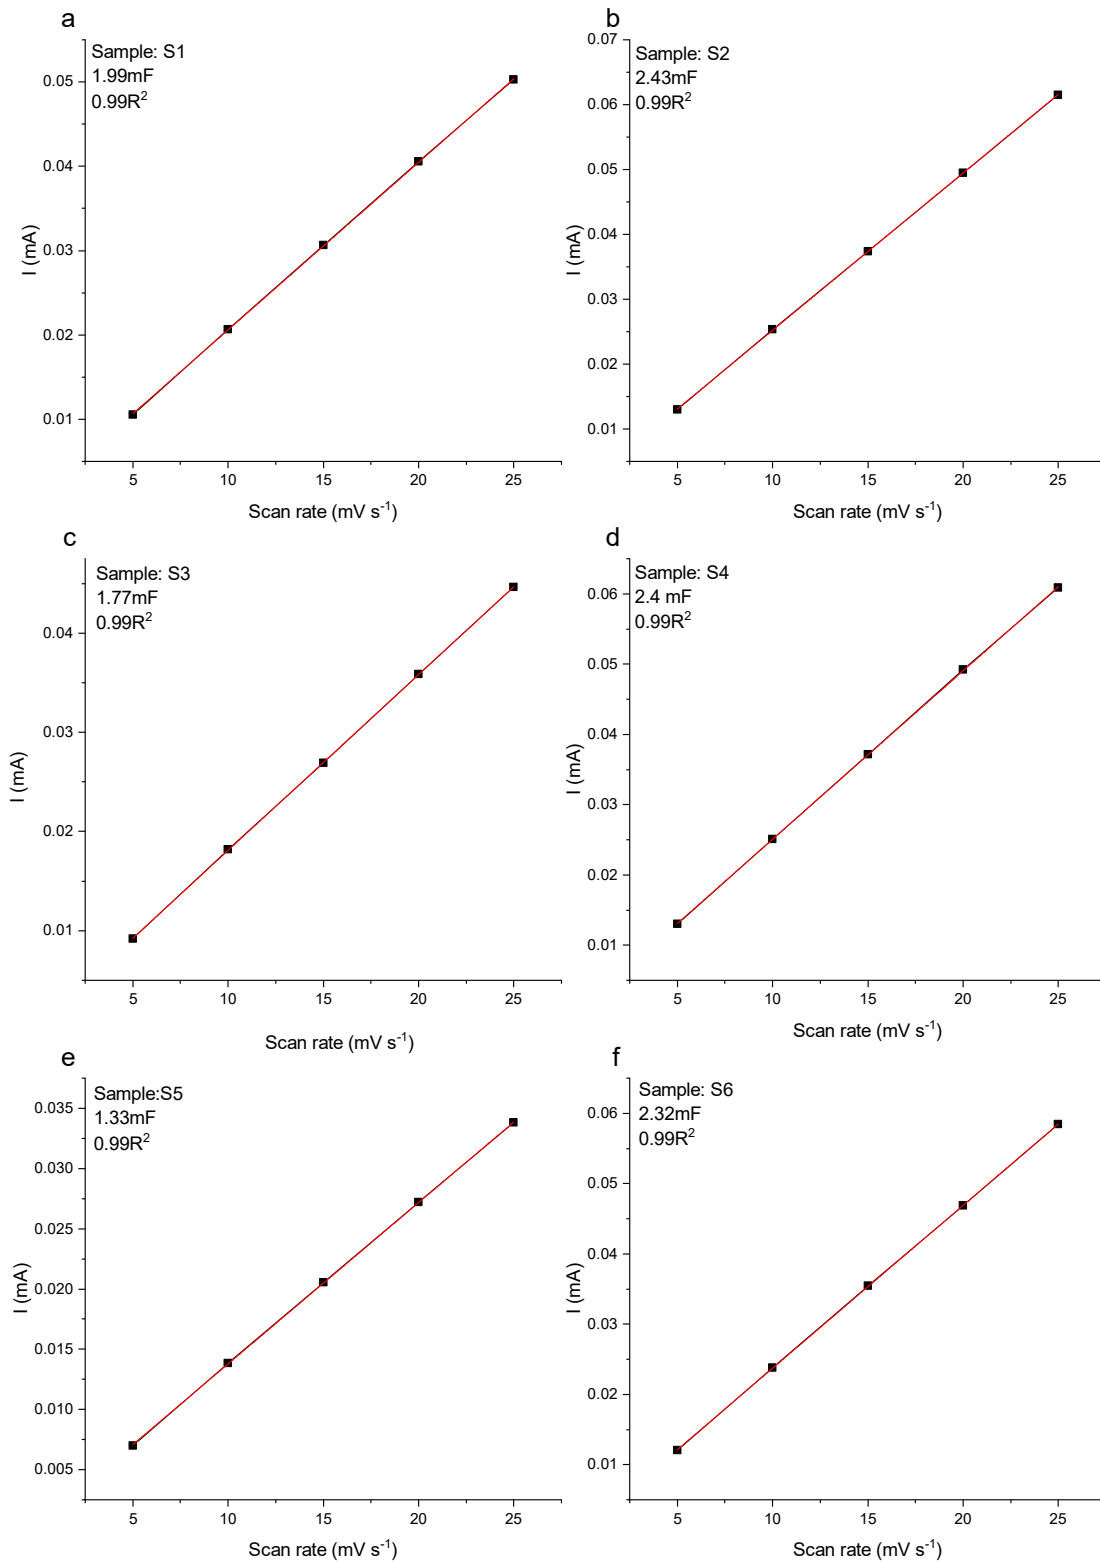

**Figure S12.** Current (taken at the potential of  $0.5 V_{\text{RHE}}$ ) as a function of scan rate derived from Figure S11.

**Table SI1.** Faradaic efficiency, BET surface area and the partial current densities for  $H_2O_2$  generation of the tested porous carbon-based samples at -0.2 V in 0.1 M  $HClO_4$ .

| Sample | $FE$ @ -0.2 V<br>[%] | $j_{H_2O_2}$ @ -0.2 V<br>[mA/geom. cm <sup>2</sup> ] | $S_{BET}$<br>[m <sup>2</sup> /g] | ECSA<br>[cm <sup>2</sup> ] | $j_{H_2O_2}$ @ -0.2 V<br>[μA/EASA cm <sup>2</sup> ] |
|--------|----------------------|------------------------------------------------------|----------------------------------|----------------------------|-----------------------------------------------------|
| S1     | 55 ± 4               | 1.48                                                 | 1594                             | 99.5                       | 2.76                                                |
| S2     | 51 ± 3               | 1.70                                                 | 1515                             | 121.5                      | 2.74                                                |
| S3     | 58 ± 0.1             | 1.68                                                 | 1354                             | 88.5                       | 3.76                                                |
| S4     | 60 ± 3               | 1.84                                                 | 1357                             | 120                        | 2.78                                                |
| S5     | 63 ± 3               | 1.85                                                 | 512                              | 66.5                       | 5.31                                                |
| S6     | 69 ± 2               | 1.70                                                 | 1677                             | 116                        | 2.87                                                |

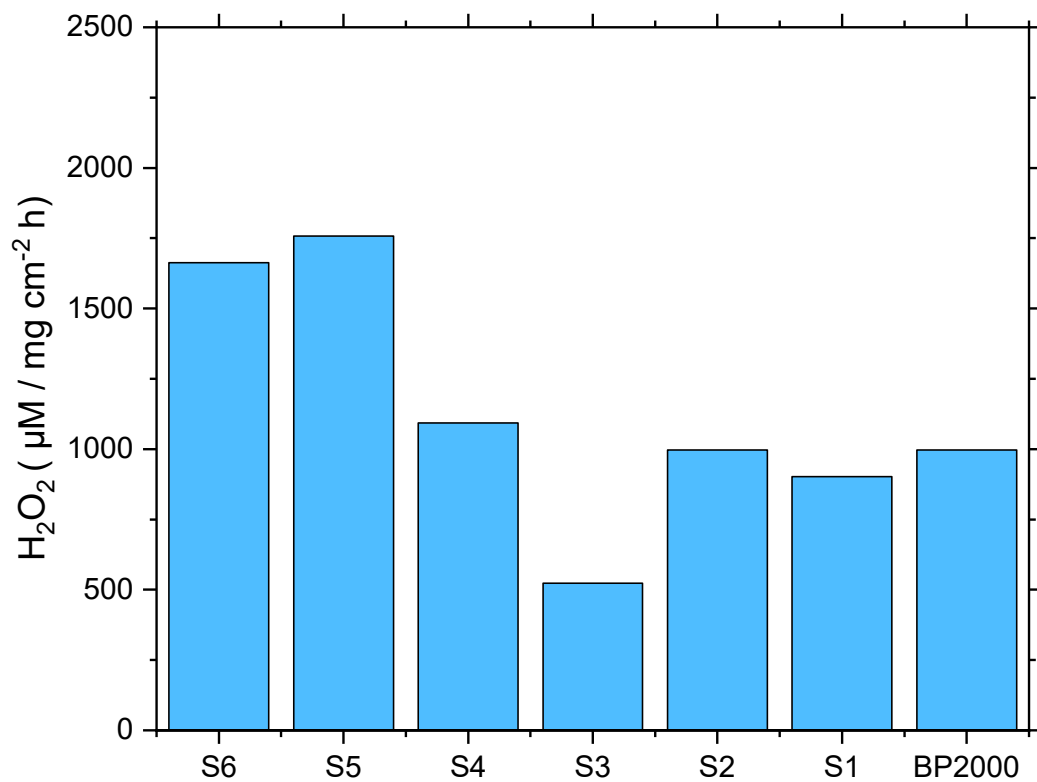

**Figure S13.** The concentration of  $\text{H}_2\text{O}_2$  produced in a bulk electrolysis experiment, under continuous  $\text{O}_2$  saturation after one hour normalized by the catalyst loading ( $0.1 \text{ mg/cm}^2$ ); BP2000 as a direct comparison, measured under the same conditions and catalyst loading.

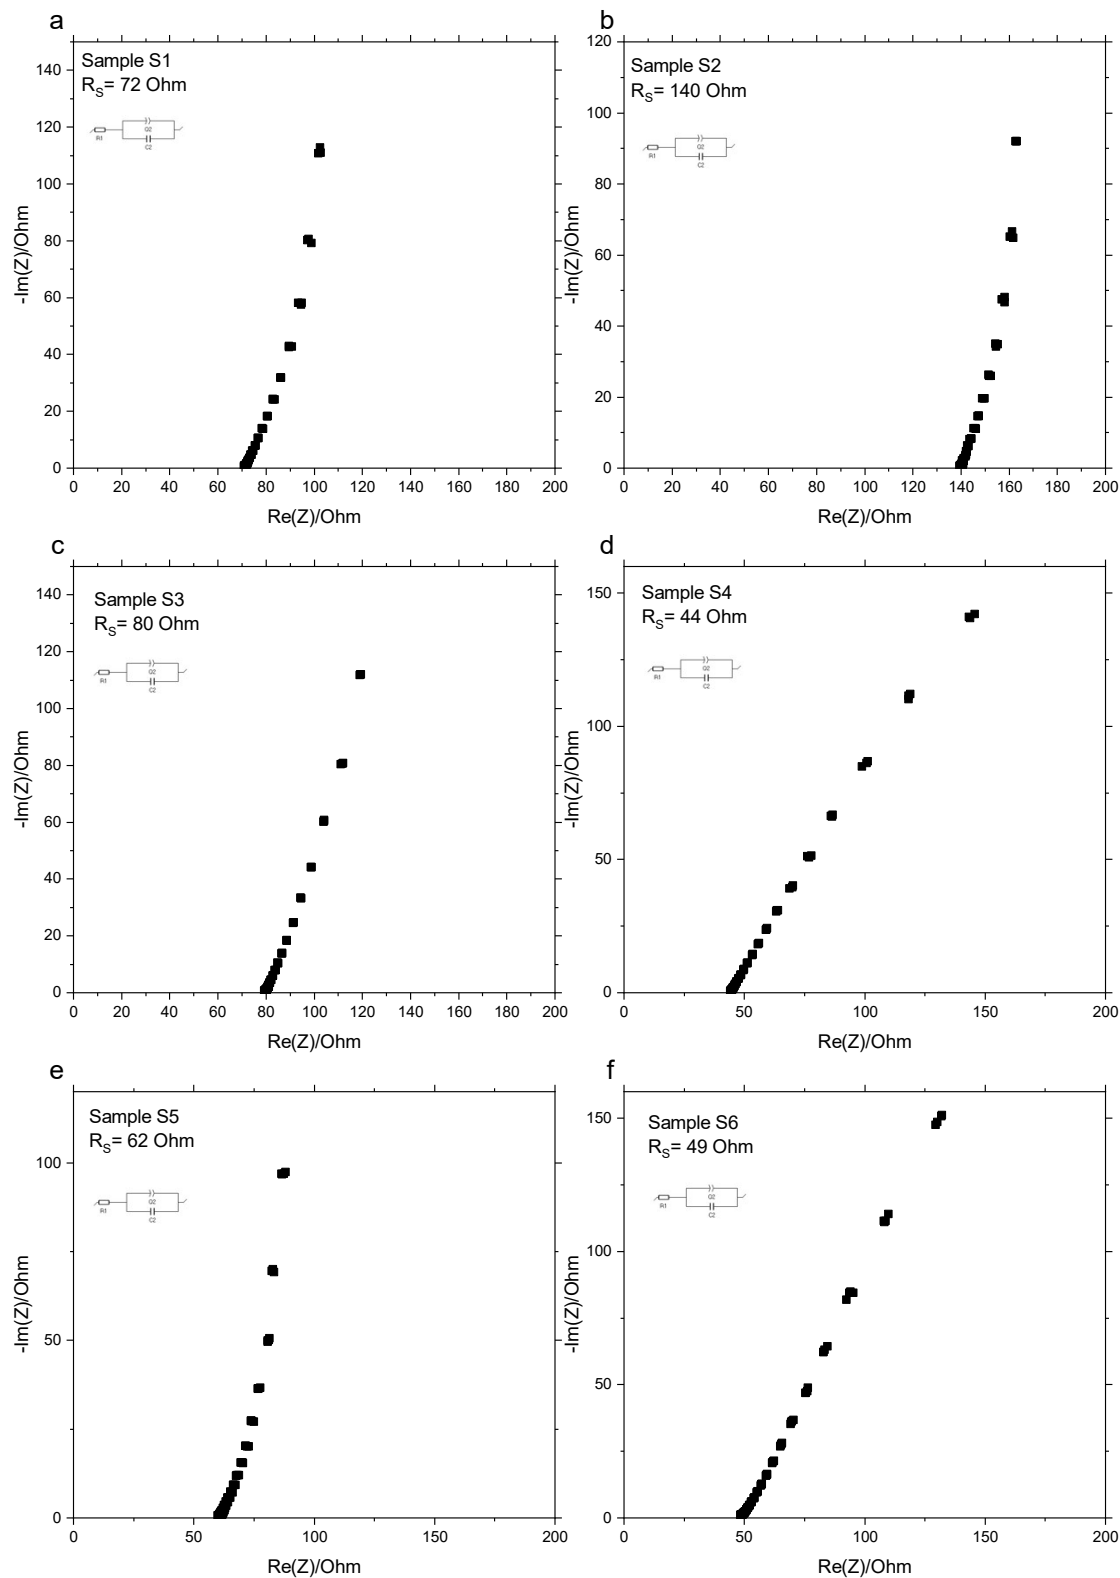

**Figure S14.** Nyquist plots of the samples S1 to S6 in an Ar-saturated in 0.1 M  $\text{HClO}_4$  aqueous electrolyte.

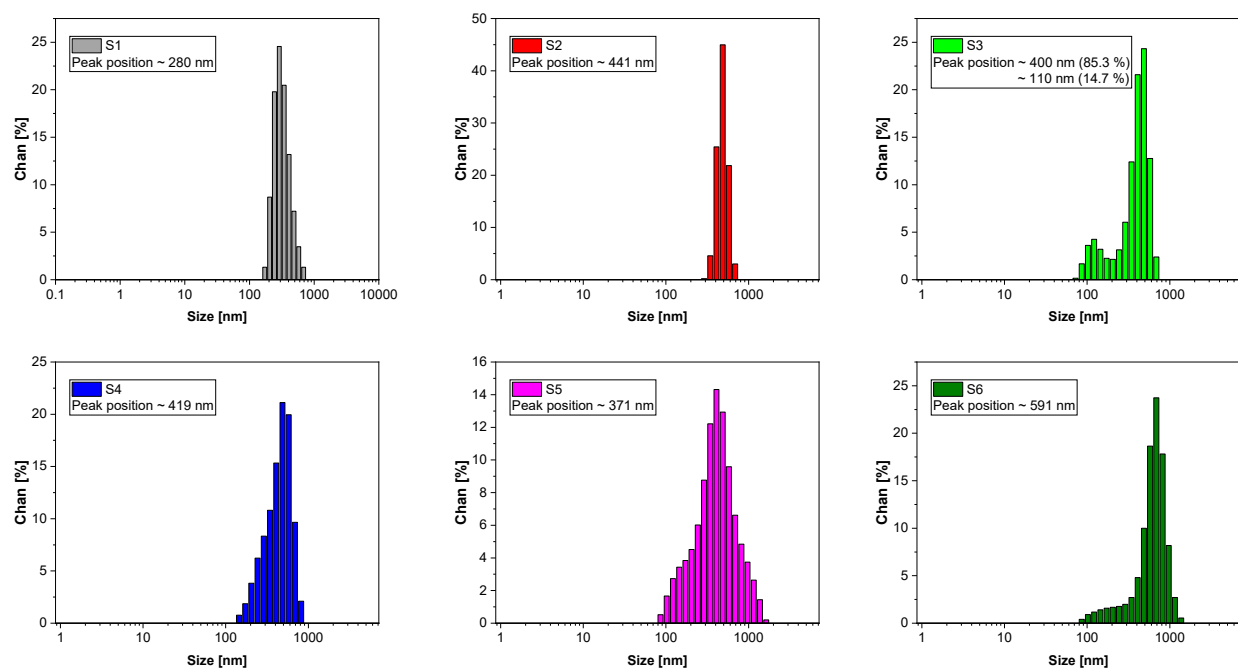

**Figure S15.** Particle size distribution of the carbon samples in 70% isopropanol – 30% water.

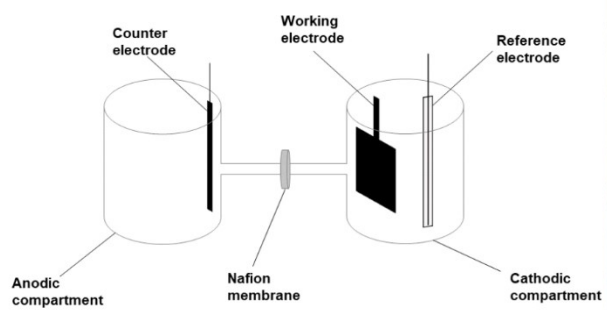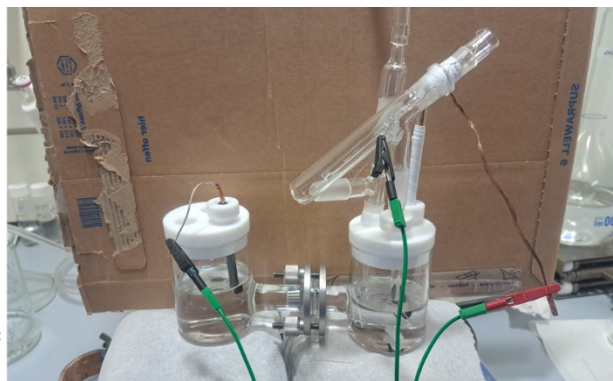

**Figure S16.** Schematic representation of the H-cell (left) and picture of the H-cell (right).

A)

B)

C)

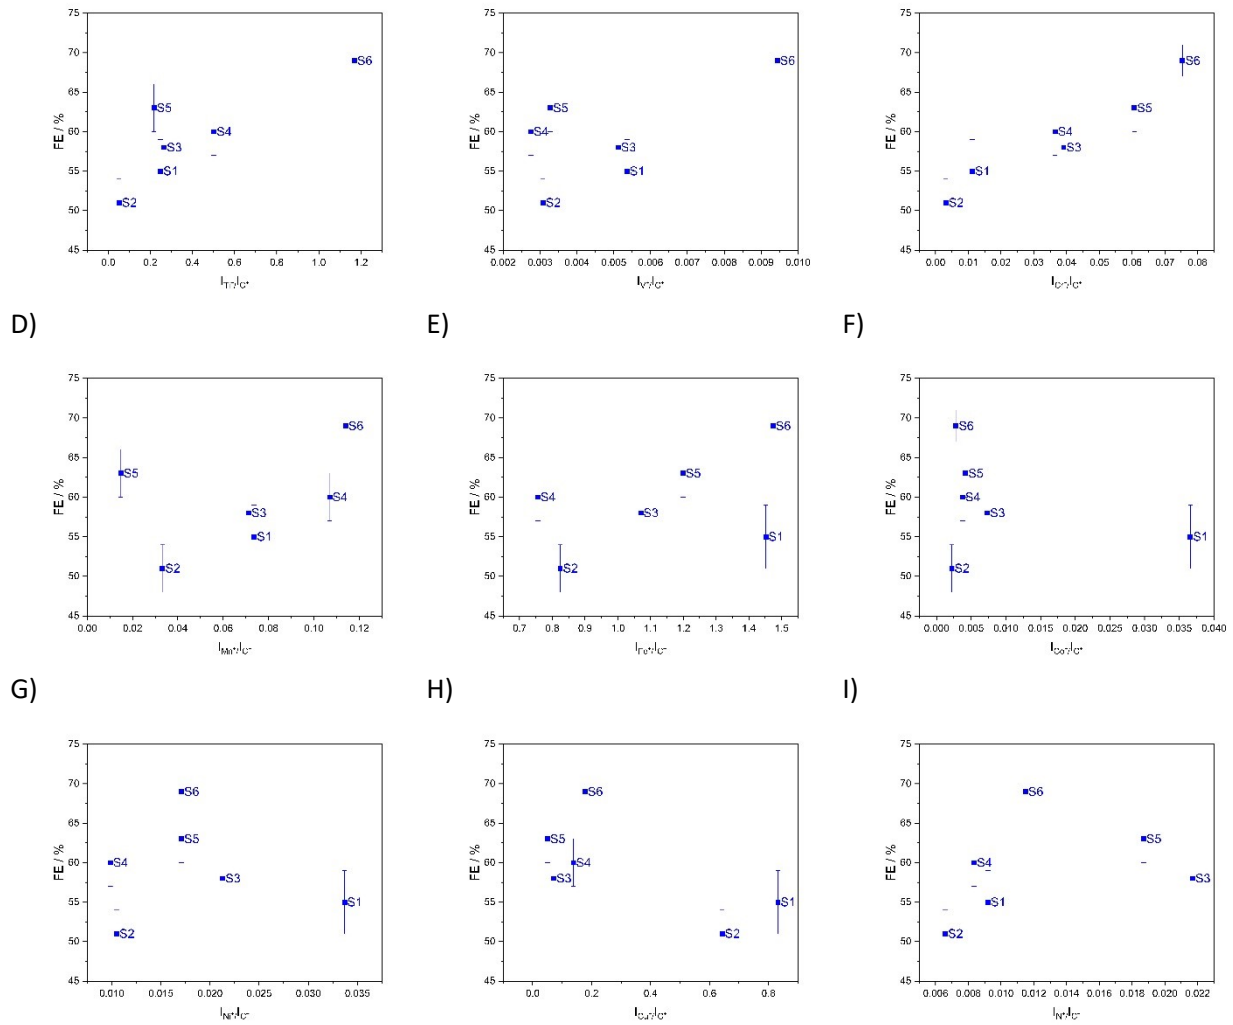

**Figure S17.** The Faradaic efficiencies of the different carbon materials as a function of the secondary ion intensities  $I_{M^+}$  of different transition metal elements M and the secondary ion intensity of the nitrogen  $I_{N^+}$ , normalized to the secondary ion intensity of the carbon mass peak  $I_{C^+}$ , as determined by TOF-SIMS for elements: A) Ti, B) V, C) Cr, D) Mn, E) Fe, F) Co, G) Ni, H) Cu and I) N

**Table SI2.** Elemental composition of samples S1 - S6 from XPS analysis. In addition, Na and K show minor concentrations in samples

| Sample | C / at.% | O / at.% | N / at.% | Na / at.% | Si / at.% | K / at.% |
|--------|----------|----------|----------|-----------|-----------|----------|
| S1     | 75.7     | 19.1     | 2.4      | 0.2       | 2.6       | 0.0      |
| S2     | 82.2     | 14.9     | 1.5      | 0.0       | 1.4       | 0.0      |
| S3     | 84.0     | 10.0     | 4.0      | 0.0       | 1.1       | 0.9      |
| S4     | 66.0     | 25.7     | 2.0      | 0.0       | 5.3       | 1.1      |
| S5     | 85.1     | 9.6      | 3.8      | 0.0       | 1.5       | 0.0      |
| S6     | 70.2     | 22.0     | 1.7      | 0.0       | 5.2       | 0.9      |

**References:**

1. Morales, D.M. and M. Risch, *Seven steps to reliable cyclic voltammetry measurements for the determination of double layer capacitance*. Journal of Physics: Energy, 2021. **3**(3): p. 034013.
2. Shi, H., *Activated carbons and double layer capacitance*. Electrochimica Acta, 1996. **41**(10): p. 1633-1639.
3. Vogel, A.I., et al., *Vogel's Textbook of Quantitative Chemical Analysis*. 2000: Prentice Hall.
